# Supplementary material for: Constitutive deficiency of the neurogenic hippocampal modulator AP2γ promotes anxiety-like behavior and cumulative memory deficits in mice from juvenile to adult periods
Source: eLife journal article supplement (doi:10.7554/elife.70685), 2021-12-03

**A**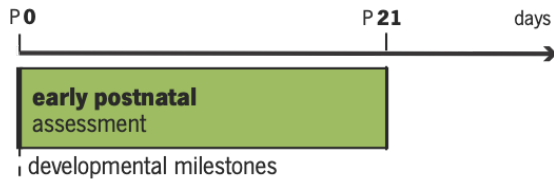**B** Rooting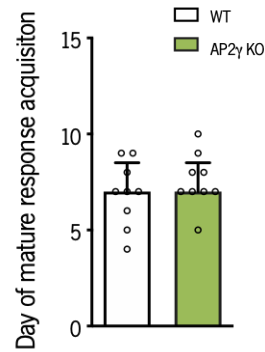**C** Ear Twitch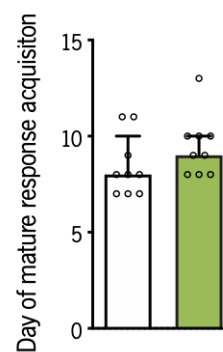**D** Auditory Startle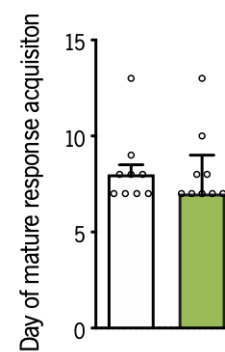**E** Open Field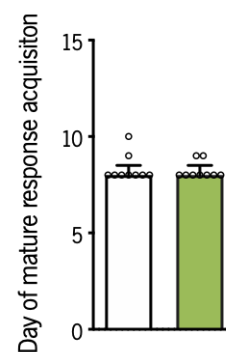**F** Walking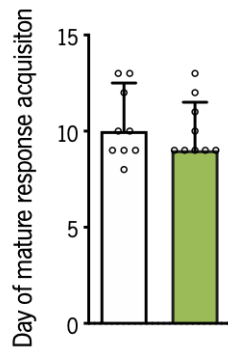**G** Surface Righting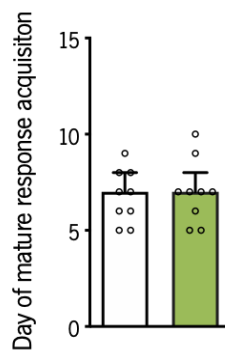**H** Negative Geotaxis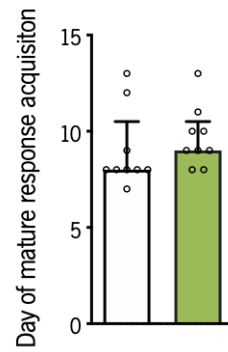**I** Cliff aversion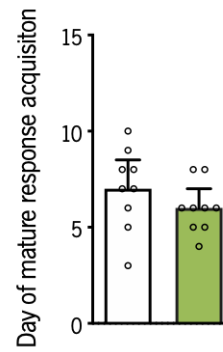**J** Postural Reflex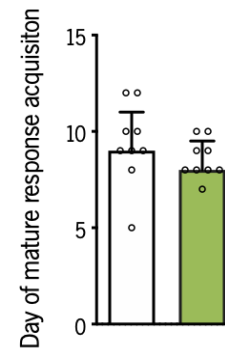**K** Air Righting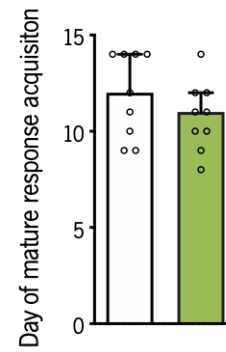

Somatic Parameters

**L** Wire Suspension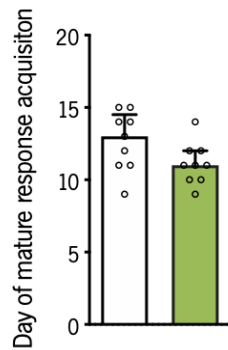**M** Grasping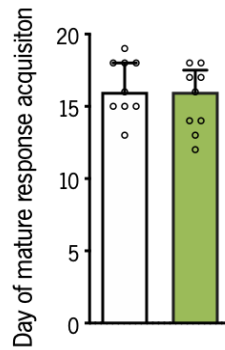**N** Homing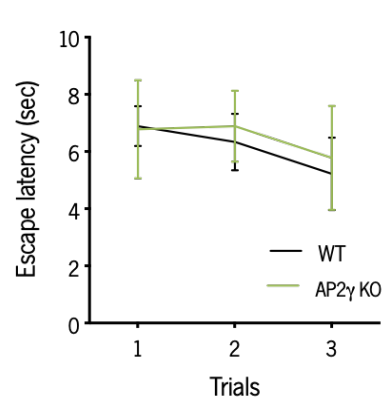**O** Weight Gain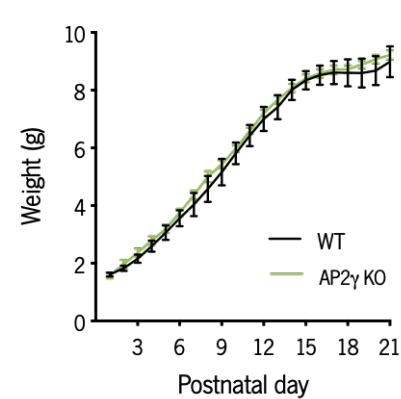**P** Eye-Opening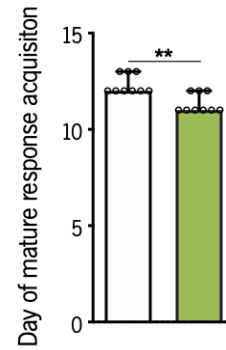

Supplement: supp [file elife-70685-supp-v1.zip › elife_poa_e70685_Figure_3_figure_supplement_1.pdf]
