# Supplementary material for: Constitutive deficiency of the neurogenic hippocampal modulator AP2γ promotes anxiety-like behavior and cumulative memory deficits in mice from juvenile to adult periods
Source: eLife journal article supplement (doi:10.7554/elife.70685), 2021-12-03
Supplement: supp [file elife-70685-supp-v1.zip]

Archive with 11 entries (11 files):
- elife_poa_e70685_Transparent_Reporting_File.pdf
- elife_poa_e70685_Figure_2_figure_supplement_1.pdf
- elife_poa_e70685_Figure_3_figure_supplement_1.pdf
- elife_poa_e70685_Figure_3_figure_supplement_2.pdf
- elife_poa_e70685_Figure_4_figure_supplement_1.pdf
- elife_poa_e70685_Figure_5_figure_supplement_1.pdf
- elife_poa_e70685_Figure_6_figure_supplement_1.pdf
- elife_poa_e70685_Figure_1_source_data_1.pdf
- elife_poa_e70685_Supplementary_file_1.docx
- elife_poa_e70685_Figure_6_source_code_1.docx
- elife_poa_e70685_Figure_6_figure_supplement_1_source_code_1.docx
