# Supplementary material for: Constitutive deficiency of the neurogenic hippocampal modulator AP2γ promotes anxiety-like behavior and cumulative memory deficits in mice from juvenile to adult periods
Source: eLife journal article supplement (doi:10.7554/elife.70685), 2021-12-03

Juvenile hippocampal DG assessment - Western-blot representative membrane

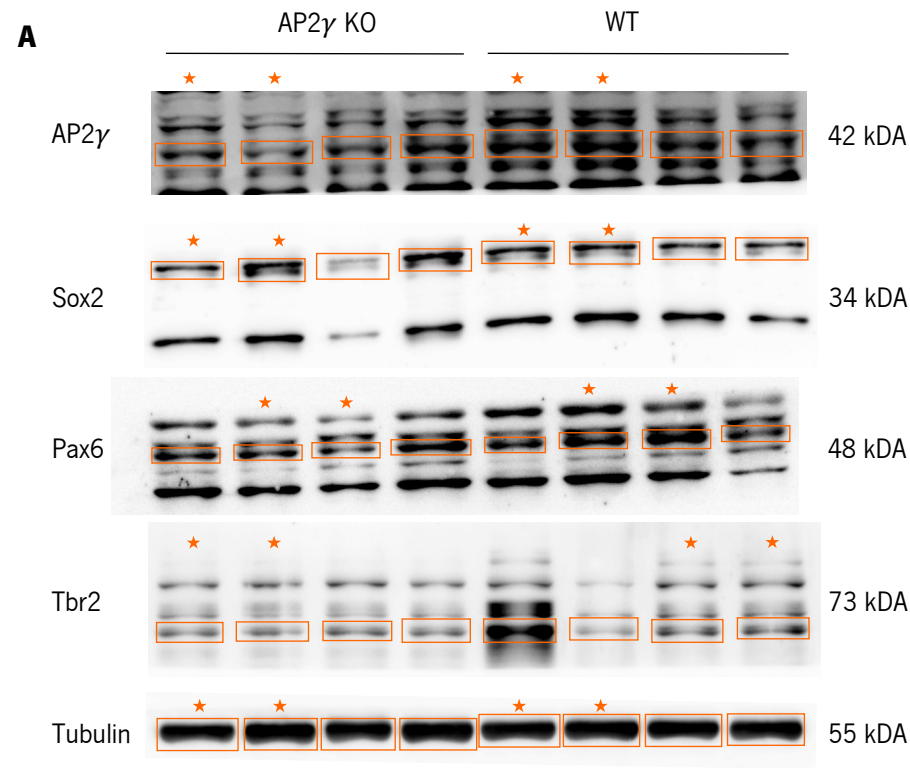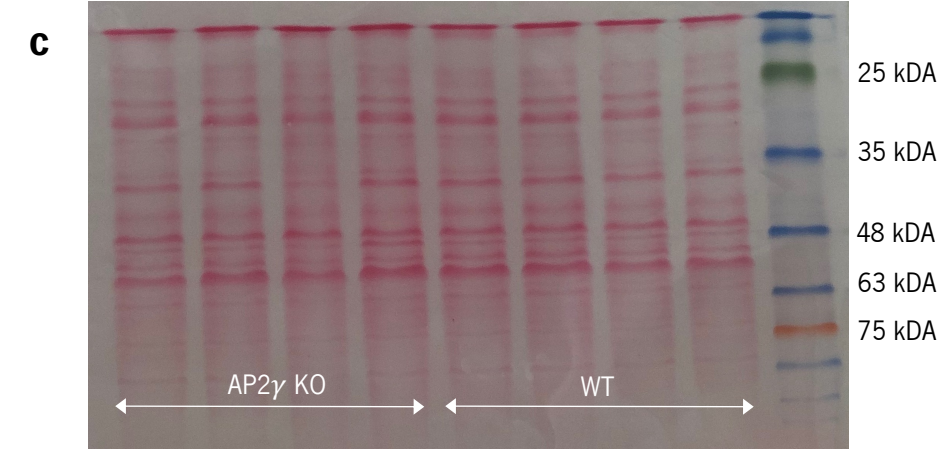

Adult hippocampal DG assessment - Western-blot representative membrane

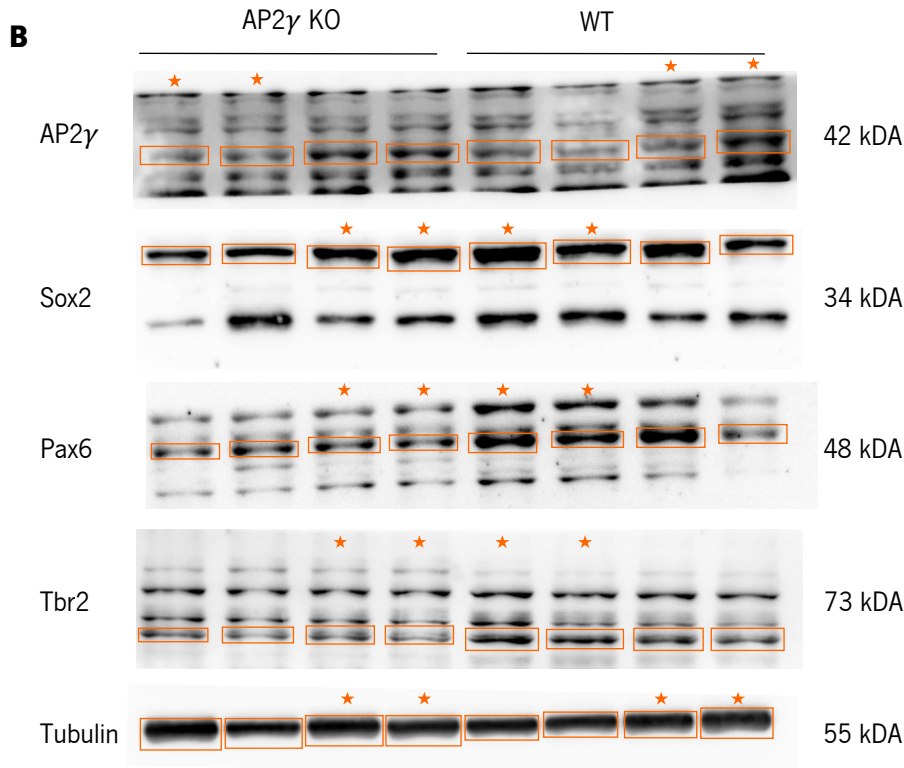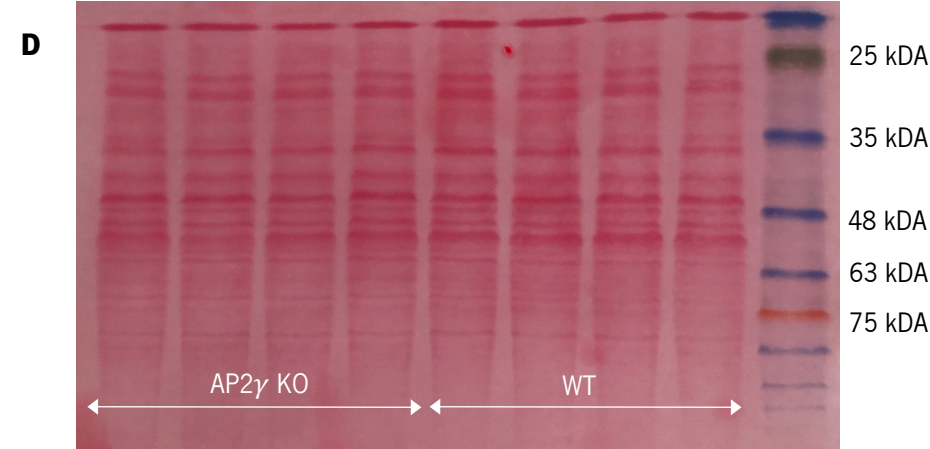

Supplement: supp [file elife-70685-supp-v1.zip › elife_poa_e70685_Figure_1_source_data_1.pdf]
