# Supplementary material for: Constitutive deficiency of the neurogenic hippocampal modulator AP2γ promotes anxiety-like behavior and cumulative memory deficits in mice from juvenile to adult periods
Source: eLife journal article supplement (doi:10.7554/elife.70685), 2021-12-03

# 3D reconstructed hippocampal granular neurons

## Juvenile assessment

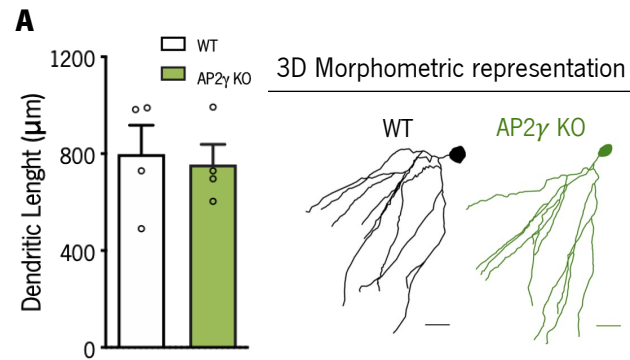

## Adult assessment

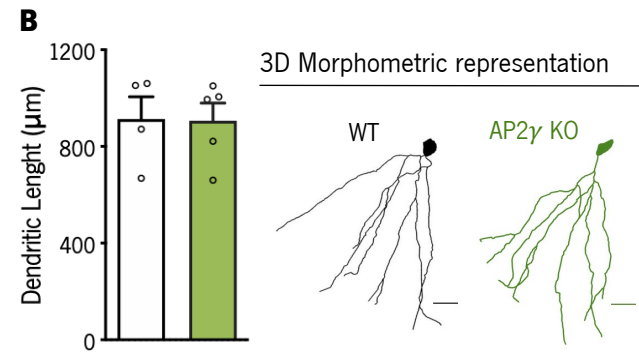

## Neuronal complexity

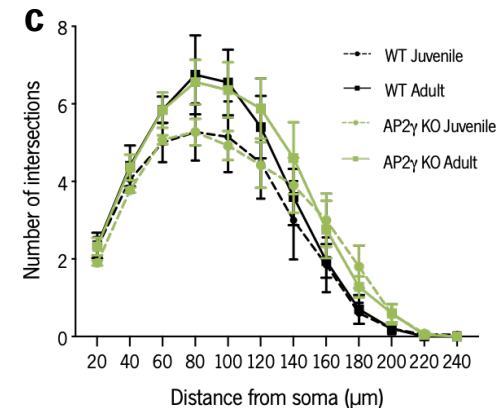

Supplement: supp [file elife-70685-supp-v1.zip › elife_poa_e70685_Figure_2_figure_supplement_1.pdf]
