# Supplementary figures and images for: Constitutive deficiency of the neurogenic hippocampal modulator AP2γ promotes anxiety-like behavior and cumulative memory deficits in mice from juvenile to adult periods
Source: eLife journal article supplement (doi:10.7554/elife.70685), 2021-12-03

## Open Field Test

**A**

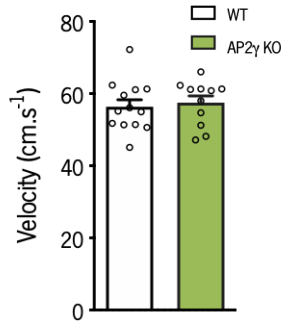

## Novelty Suppressed Feeding Test

**B**

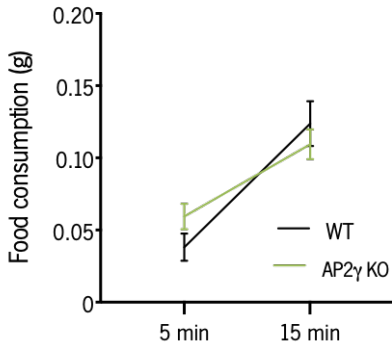

Supplement: supp [file elife-70685-supp-v1.zip › elife_poa_e70685_Figure_3_figure_supplement_2.pdf]

## Open Field Test

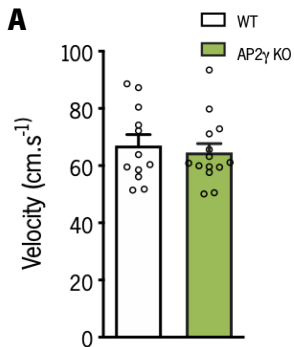

## Novelty Suppressed Feeding Test

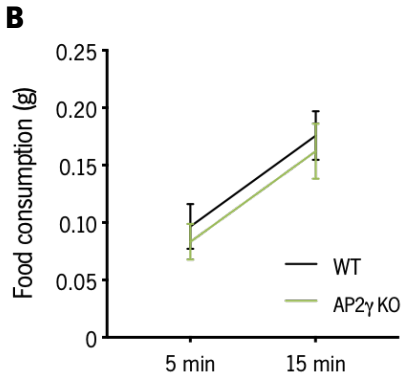

Supplement: supp [file elife-70685-supp-v1.zip › elife_poa_e70685_Figure_4_figure_supplement_1.pdf]

# Water Maze Task

**A**

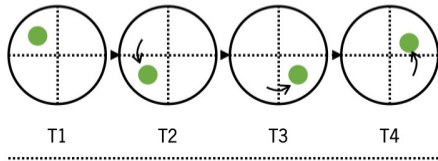

**Working Memory Task**

**B**

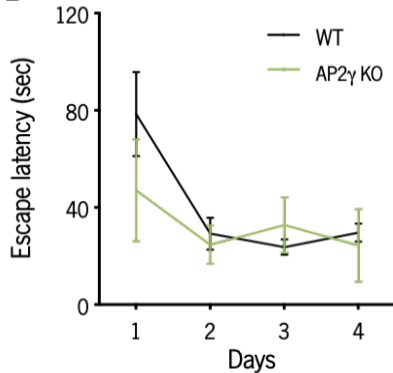

Supplement: supp [file elife-70685-supp-v1.zip › elife_poa_e70685_Figure_5_figure_supplement_1.pdf]

## Coherence between vHip and mPFC

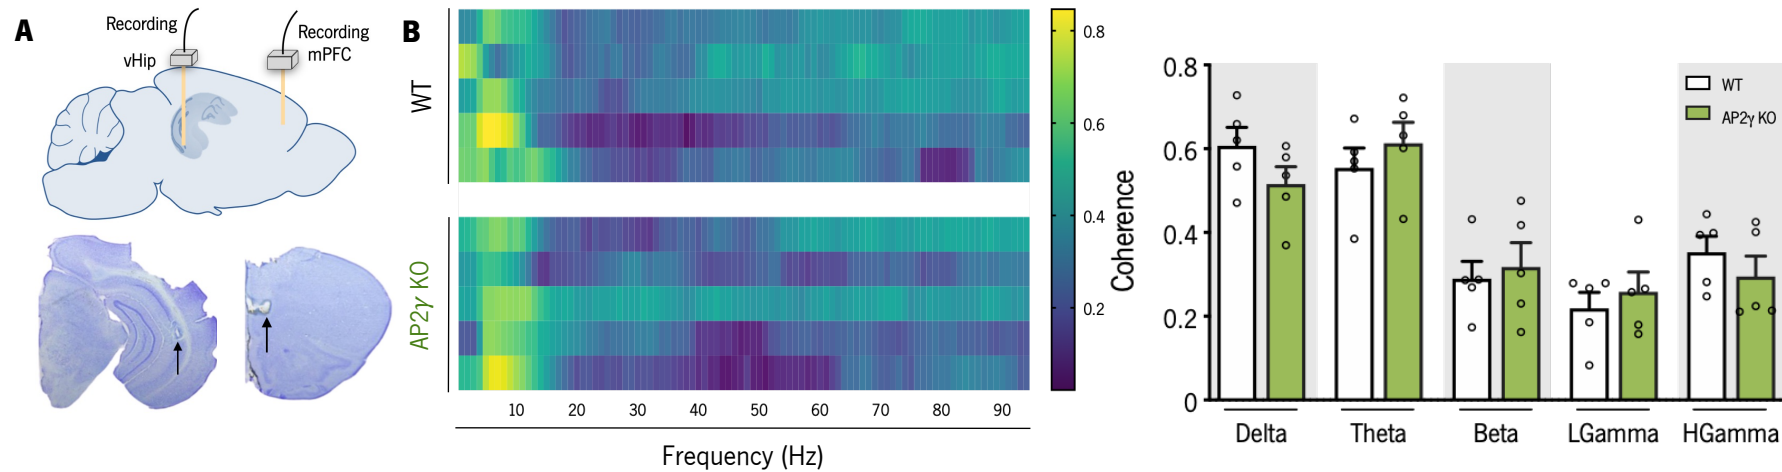

## PSD measured in the vHIP

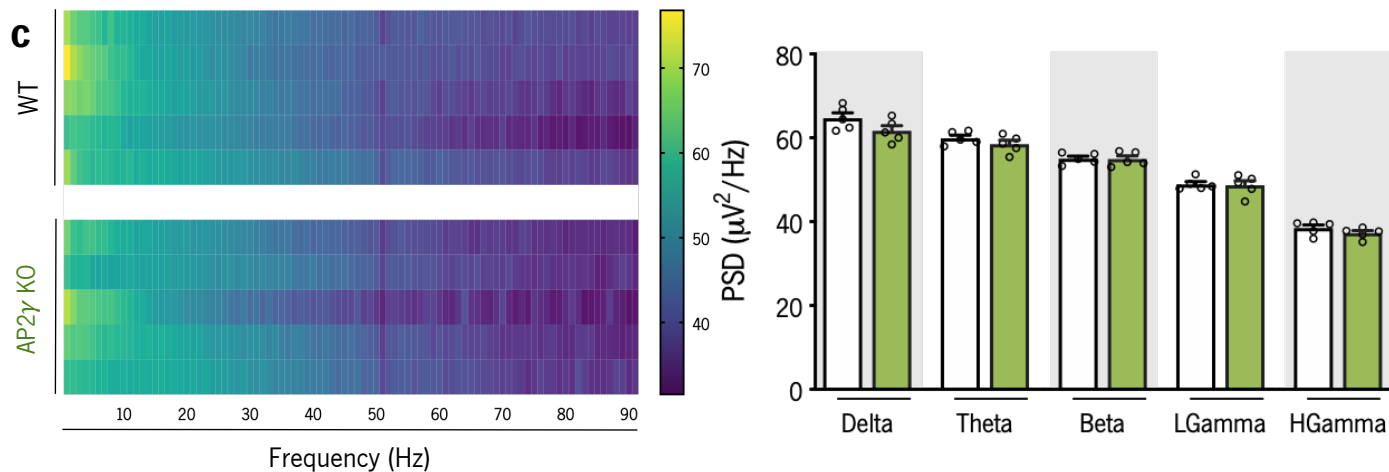

Supplement: supp [file elife-70685-supp-v1.zip › elife_poa_e70685_Figure_6_figure_supplement_1.pdf]
